# Supplementary material for: Recovery of Polyphenols from Grape Pomace Using Polyethylene Glycol (PEG)-Grafted Silica Particles and PEG-Assisted Cosolvent Elution
Source: PubMed Central journal article supplement (PMC6630576; doi:10.3390/molecules24122199), 2019-06-12
Supplement: molecules-24-02199-s001.pdf [file molecules-24-02199-s001.pdf]

## Supporting Information

# Recovery of polyphenols from grape pomace using polyethylene glycol (PEG)-grafted silica particles and PEG assisted co-solvent elution

*Ayca Seker <sup>\*1</sup>, Baran Arslan <sup>2</sup>, and Shulin Chen <sup>1</sup>*

<sup>1</sup>Department of Biological Systems Engineering, Washington State University, Pullman, WA, 99164-6120, United States

<sup>2</sup>Gene and Linda Voiland School of Chemical Engineering and Bioengineering, Washington State University, Pullman, WA, 99164-6515, United States

**Table S1. Individual phenolic compounds of grape pomace extract**

|                      | Individual Polyphenols (mg L <sup>-1</sup> ) |                 |                  |                 |                  |                 |                 |                 |                 |                  |
|----------------------|----------------------------------------------|-----------------|------------------|-----------------|------------------|-----------------|-----------------|-----------------|-----------------|------------------|
|                      | GA <sup>1</sup>                              | CA <sup>2</sup> | PB2 <sup>3</sup> | DC <sup>4</sup> | pCA <sup>5</sup> | IC <sup>6</sup> | MC <sup>7</sup> | MY <sup>8</sup> | QU <sup>9</sup> | KA <sup>10</sup> |
| Grape pomace extract | 70.2<br>±0.6                                 | 983.2<br>±37.7  | 288.8<br>±2.5    | 486.7<br>± 31.2 | 47.9<br>±5.4     | 487.3<br>±0.9   | 345.6<br>±3.1   | 10.4±<br>0.5    | 275.3<br>±0.4   | 259.4<br>±4.7    |

<sup>1</sup>GA:Gallic Acid, <sup>2</sup>CA:(+)-Catechin, <sup>3</sup>PB2:Procyanidin-B2, <sup>4</sup>DC:Delphinidin Chloride, <sup>5</sup>pCA:P-coumaric acid, <sup>6</sup>IC:Isoquercetin, <sup>7</sup>MC: Malvidin Chloride, <sup>8</sup>Myricetin: MY, <sup>9</sup>Quercetin: QU, <sup>10</sup>Kaempferol: KA. Data are represented in mean ± standard deviation of duplicates.
